# Supplementary material for: Layer-by-layer surface decoration of electrospun nanofibrous meshes for air–liquid interface cultivation of epidermal cells
Source: Royal Society of Chemistry journal article supplement (doi:10.1039/c6ra23287f), 2016-01-01
Supplement: c6ra23287f1.pdf [file c6ra23287f1.pdf]

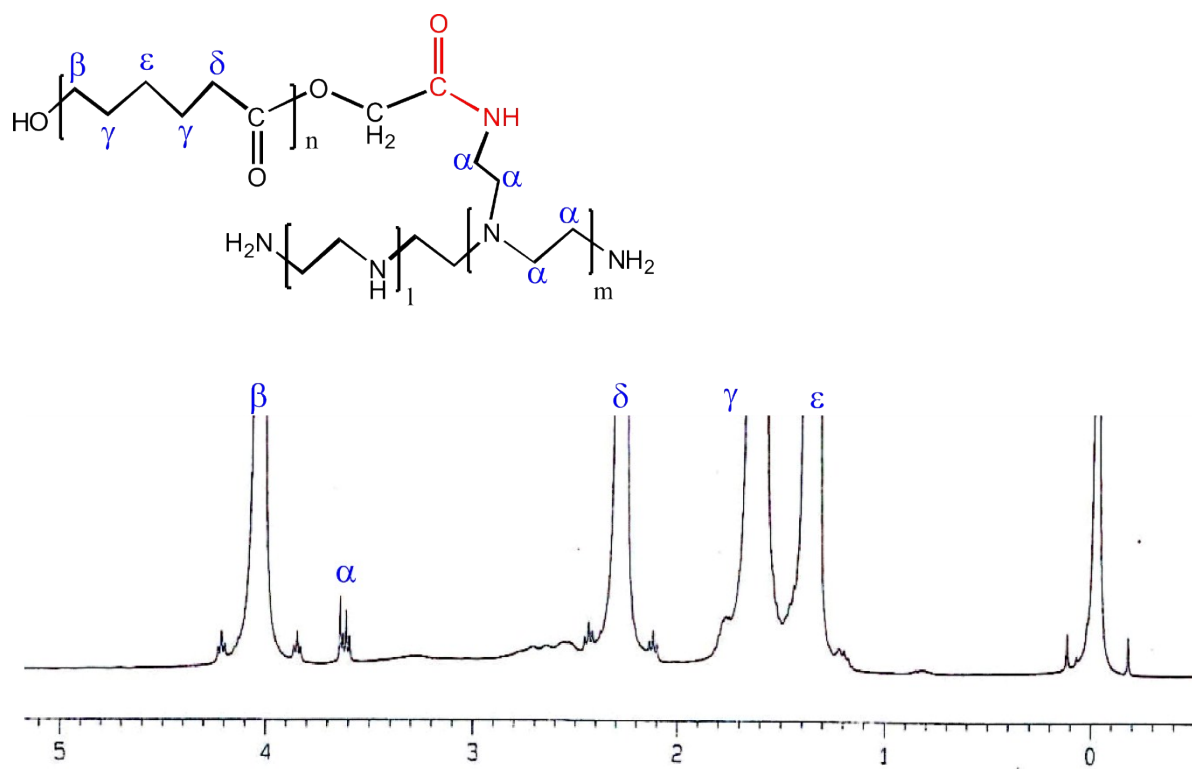

S1.  $^1\text{H}$  NMR of PCL-PEI block copolymer.

Endothermic curve

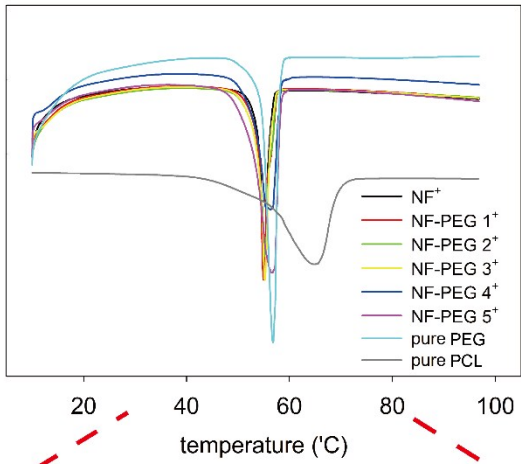

Exothermic curve

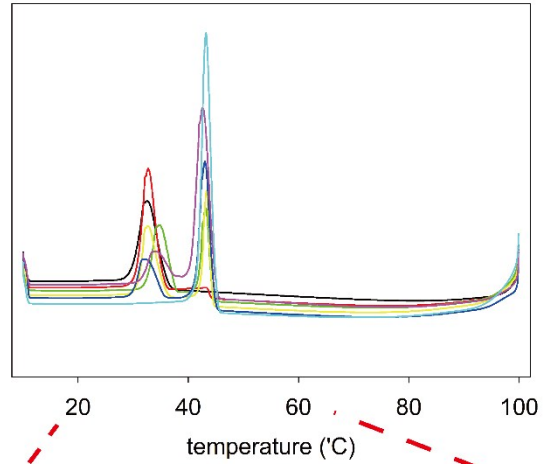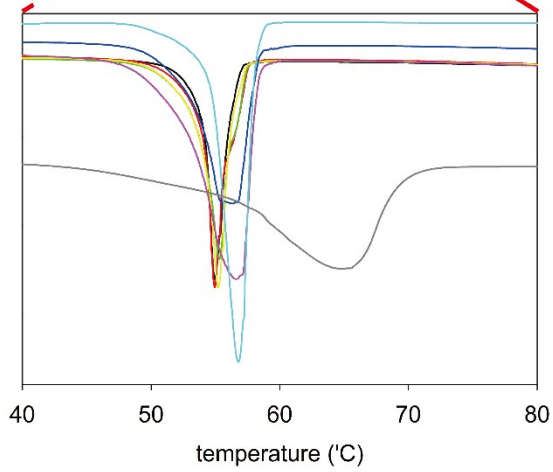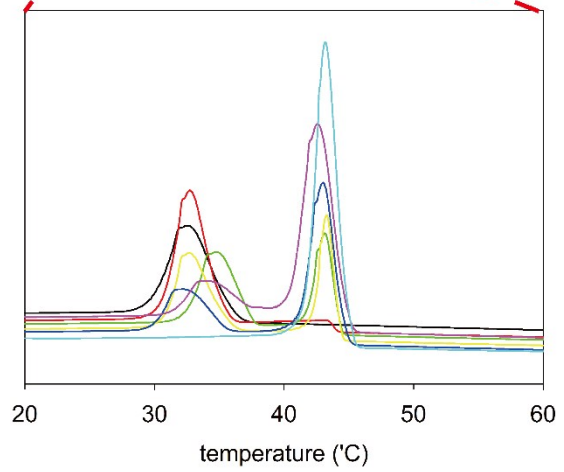

S2. Exothermic property of PEG layered nanofiber by DSC.

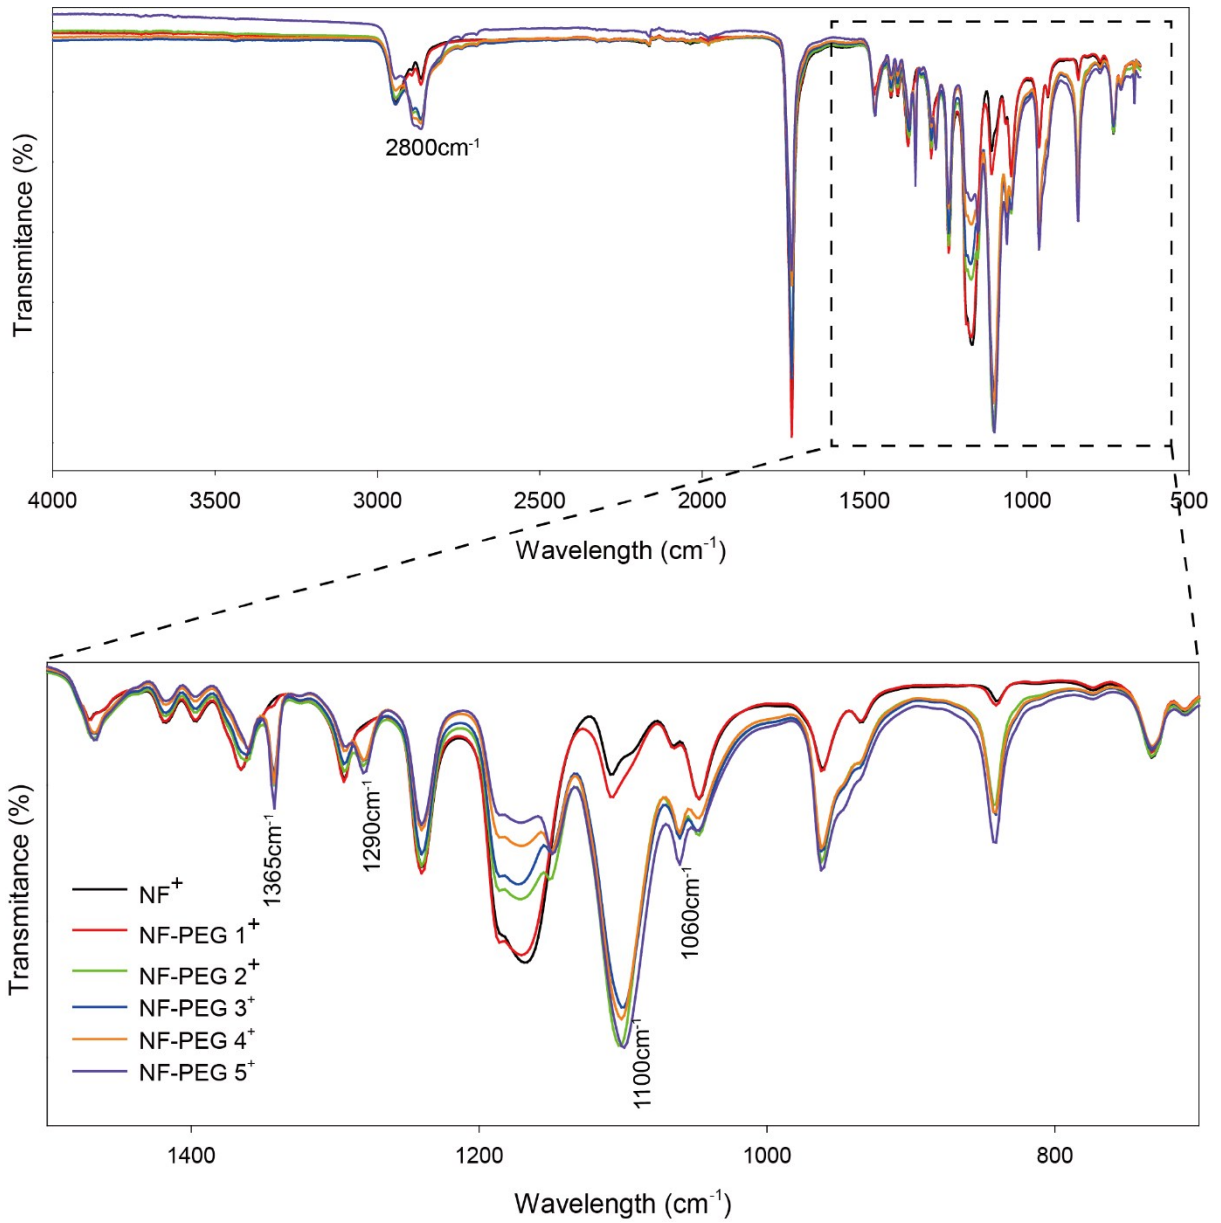

S3. FT-IR of PEG layered nanofiber.

Table S1. Primers for real time PCR.

| Primer               | Sequence             | T <sub>m</sub> , °C | product size, bp |
|----------------------|----------------------|---------------------|------------------|
| GAPDH-F <sup>a</sup> | ACCCAGAAGACTGTGGATGG | 59.962              | 125              |
| GAPDH-R <sup>b</sup> | TTCAGCTCAGGGATGACCTT | 59.803              |                  |
| Keratin 14-F         | CATCCTTGCGGTTCTTCTCT | 59.430              | 114              |
| Keratin 14-R         | TGGGTGGAGATGTCAATGTG | 60.378              |                  |
| Loricrin-F           | CATGATGCTACCCGAGGTTT | 59.955              | 132              |
| Loricrin-R           | ACTGGGGTTGGGAGGTAGTT | 59.717              |                  |
| Filaggrin-F          | GTCGATTTGTCCCAGCCTTA | 60.042              | 107              |
| Filaggrin-R          | TCAGACGACTCCGAGAGGTT | 59.986              |                  |
| Involucrin-F         | AAACCCAGAGCAGCAGCTTA | 60.154              | 196              |
| Invorucrin-R         | CTCTAGGTGCTTCAGGTGCC | 60.012              |                  |

<sup>a</sup> F: forward primer sequence

<sup>b</sup> R: reverse primer sequence
